# Supplementary material
Source: publisher figshare collection journal article supplement (https://rs.figshare.com/ndownloader/files/14455628)
Supplement: Supplementary file 1 [file 14455628]

## Sheet: Data
	Site	Sample	Blue Fibre	Black Fibre	Red Fibre	Purple Fibre	Blue Fragment	Pink fragment	Total Microplastic	Mean
	K 7014	1	1	0	0	0	0	0	1
		2	0	1	0	0	0	0	1								Blue Fragment	Pink fragment	Total	Percent ingested
		3	3	0	0	0	0	0	3								2	0	2	60
		4	0	0	0	0	0	0	0								5	0	5	70
		5	0	0	0	0	0	0	0								1	0	1	70
		6	1	0	0	0	0	0	1								4	0	4	80
		7	2	0	0	0	0	0	2								0	1	1	70
		8	0	0	0	0	0	0	0								0	0	0	70
		9	1	0	0	0	1	0	2								4	0	4	100
		10	1	0	0	0	0	0	1	1.1							0	0	0	50
	K 7884	1	0	0	1	0	0	0	1								3	0	3	80
		2	0	0	0	0	0	0	0
		3	1	0	0	0	1	0	2
		4	0	0	0	0	0	0	0
		5	1	0	0	0	1	0	2
		6	1	0	0	0	0	0	1
		7	2	0	0	0	1	0	3
		8	0	0	1	0	0	0	1
		9	0	0	0	0	1	0	1
		10	1	0	0	0	0	0	1	1.2
	K 9053	1	1	1	0	0	0	0	2
		2	0	0	0	0	0	0	0
		3	1	1	0	0	0	0	2
		4	0	0	0	0	0	0	0
		5	0	0	0	0	0	1	1
		6	1	1	0	0	0	0	2
		7	0	1	0	0	0	0	1
		8	1	0	0	0	0	0	1
		9	1	0	0	0	0	0	1
		10	0	0	0	0	0	0	0	1
	K 9908	1	1	0	0	0	0	0	1
		2	3	0	0	0	0	0	3
		3	0	0	0	0	0	0	0
		4	0	0	0	0	0	0	0
		5	1	1	1	0	0	0	3
		6	3	0	0	0	0	0	3
		7	1	0	0	0	0	0	1
		8	1	0	0	0	0	0	1
		9	0	0	0	0	0	0	0
		10	1	0	0	0	0	0	1	1.3
	PC 7050	1	1	0	0	0	0	0	1
		2	0	0	0	0	2	0	2
		3	2	1	0	0	0	0	3
		4	1	0	0	0	1	0	2
		5	0	0	0	0	0	0	0
		6	0	0	1	0	0	0	1
		7	1	0	0	0	0	0	1
		8	1	0	0	0	0	0	1
		9	0	0	0	0	0	0	0
		10	1	0	0	0	0	0	1	1.2
	M 10890	1	4	1	0	1	2	0	8
		2	1	1	0	0	0	0	2
		3	1	1	0	0	1	0	3
		4	1	0	0	0	0	0	1
		5	1	0	0	0	1	0	2
		6	3	2	0	0	0	0	5
		7	4	0	0	0	0	0	4
		8	2	1	0	0	0	0	3
		9	4	0	0	0	0	0	4
		10	1	0	0	0	0	0	1	3.3
	NH 6948	1	0	0	0	0	0	0	0	0
		2	0	0	0	0	0	0	0	0
		3	3	0	0	0	0	0	3
		4	1	0	0	0	0	0	1
		5	0	0	0	0	0	0	0
		6	1	0	0	0	0	0	0
		7	2	0	1	0	0	0	3
		8	0	1	0	0	0	0	1
		9	1	0	0	0	0	0	1
		10	0	0	0	0	0	0	0	0.9
	IB	1	0	0	0	0	0	0	0
		2	3	0	0	0	0	0	3
		3	1	0	0	0	0	0	1
		4	0	0	0	0	0	0	0
		5	0	0	0	0	1	0	1
		6	0	0	0	0	1	0	1
		7	0	0	0	0	0	0	0
		8	2	0	1	0	0	0	3
		9	0	0	0	0	0	0	0
		10	1	0	0	0	0	0	1	1
	J 7703	1	1	0	0	0	0	0	1
		2	0	0	0	0	0	0	0
		3	0	0	0	0	1	0	1
		4	2	0	0	0	1	0	3
		5	0	0	0	0	0	0	0
		6	0	0	0	0	1	0	1
		7	1	0	0	0	0	0	1
		8	1	0	0	0	1	0	2
		9	1	0	0	0	1	0	2
		10	0	0	0	0	0	0	0	1.1

## Sheet: Meta data
CRUISE	Station	Date	Year	Trench	Region	Latitude	Longitude	Depth	Vessel	Sampling gear	Species
KT0903	ST#02	2014-03-18	2009	Izu-Bonin	NW Pacific	27 20.99N	143 18.89E	9316	RV Tansei-Maru	Hadal-Lander A	Hirondellea gigas
KH0803	ST#01	2014-09-30	2008	Japan	NW Pacific	36 14.96 N	142 49.01E	7703	RV Hakuho-Maru	Hadal-Lander A	Hirondellea gigas
KAH1202	ST#08	2012-02-21	2012	Kermadec	SW Pacific	31 58.71S	177 23.31W	9053	RV Kaharoa	Latis	Hirondellea dubia
KAH1109	ST#12	2011-11-30	2011	Kermadec	SW Pacific	32 01.594S	177 22.25W	9908	RV Kaharoa	Latis	Hirondellea dubia
KAH1109	ST#04	2011-11-28	2011	Kermadec	SW Pacific	32 45.575S	177 14.455W	7014	RV Kaharoa	Obulus	Hirondellea dubia
KAH1109	ST#9	29-Nov	2011	Kermadec	SW Pacific	32 36.985S	177 21.493W	7884	RV Kaharoa	Latis	Hirondellea dubia
SY1615	LH03	2017-01-29	2017	Mariana	NW Pacific	11 22.010N	142 25.791E	10890	TV Shinyo-Maru	Hadal-Lander C	Hirondellea gigas
KAH1310	ST#27	2013-11-21	2013	New Hebrides	SW Pacific	20 38.91S	168 36.83E	6948	RV Kaharoa	Hadal-Lander C	Hirondellea dubia
SO209	ST#35	2014-09-10	2010	Peru-Chile	SE Pacific	17 25.47S	73 37.01W	7050	RV Sonne	Hadal-Lander B	Eurythenes gryllus
